# Supplementary material for: Evaluating nanoparticle localisation in glioblastoma multicellular tumour spheroids by surface enhanced Raman scattering
Source: PubMed Central journal article supplement (PMC10332387; doi:10.1039/d3an00751k), 2023-06-16

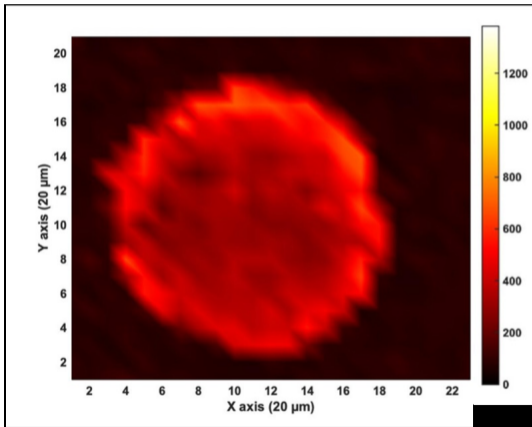

Supplement: AN-148-D3AN00751K-s007.pdf [file AN-148-D3AN00751K-s007.pdf]
